# Supplementary material for: ORF-Interrupting Mutations in Monkeypox Virus Genomes from Washington and Ohio, 2022
Source: MDPI journal article supplement (doi:10.3390/v14112393), 2022-10-29
Supplement: s1 [file s1]

## Supplementary Materials

**Supplementary Table S1.** Sequence Read Archive (SRA) and GenBank accessions for MPXV sequencing raw reads and consensus genomes with indicated mutations. Mutation types and genomic positions relative to ON563414.3 are indicated. SRA accessions for raw reads from the resequencing of variants are indicated by asterisks.

| Sample       | GenBank Accession | SRA Accession               | Mutation Type                |
|--------------|-------------------|-----------------------------|------------------------------|
| WA-UW-074978 | OP434519.1        | SRR20913436<br>SRR21620332* | Deletion 185572-192453       |
| WA-UW-096851 | OP681776.1        | SRR21966445<br>SRR22019271* | Deletion 13224-17428         |
| WA-UW-082786 | OP650027.1        | SRR21897921<br>SRR22019272* | Deletion 11343-12255         |
| OH-UW-070197 | OP442936.1        | SRR21236090<br>SRR21620337* | Deletion C11764              |
| OH-UW-070832 | OP442937.1        | SRR20913441<br>SRR21620331* | G5612A, C191594T             |
| OH-UW-071048 | OP442938.1        | SRR21598457<br>SRR21620329* | Insertion A128943            |
| OH-UW-078962 | OP442939.1        | SRR21236093<br>SRR21620338* | G5612A, C191594T             |
| OH-UW-086376 | OP442940.1        | SRR21236113<br>SRR21620340* | G5612A, C191594T             |
| WA-UW-082488 | OP442941.1        | SRR21236117<br>SRR21620341* | G5612A, C191594T             |
| WA-UW-084331 | OP442942.1        | SRR21236107<br>SRR21620330* | C25984T                      |
| WA-UW-086026 | OP442943.1        | SRR21236097<br>SRR21620339* | G5612A, C191594T             |
| WA-UW-081469 | OP442944.1        | SRR21524980<br>SRR21620335* | C155347T                     |
| WA-UW-083698 | OP442945.1        | SRR21524973<br>SRR21620333* | C151619T                     |
| WA-UW-085393 | OP442946.1        | SRR21524975<br>SRR21620336* | G1529A, C195677T             |
| WA-UW-088793 | OP442947.1        | SRR21524979<br>SRR21620334* | C151619T                     |
| WA-UW-080247 | OP628437.1        | SRR21887143<br>SRR22019269* | G5612A, C191594T             |
| WA-UW-085241 | OP628463.1        | SRR21887132<br>SRR22019268* | G1529A, G12116A,<br>C195677T |
| WA-UW-093570 | OP628490.1        | SRR21887131<br>SRR22019267* | C25984T                      |
| WA-UW-082515 | OP628447.1        | SRR21887120<br>SRR22019266* | G5612A, C191594T             |

|                   |            |                             |                              |
|-------------------|------------|-----------------------------|------------------------------|
| WA-UW-082002      | OP628445.1 | SRR21887118<br>SRR22019265* | G1529A, G12116A,<br>C195677T |
| WA-UW-091243      | OP681773.1 | SRR21966448<br>SRR22019264* | G5612A, C191594T             |
| WA-UW-092889      | OP681774.1 | SRR21966447<br>SRR22019263* | G5612A, C191594T             |
| WA-UW-098497      | OP681775.1 | SRR21966446<br>SRR22019262* | G5612A, C191594T             |
| WA-UW-092113      | OP681777.1 | SRR21966444<br>SRR22019270* | C25984T                      |
| WA-UW-085088      | OP681772.1 | SRR21966449<br>SRR22019273* | C25984T                      |
| WA-UW-074184      | OP169341.1 | SRR20913437                 |                              |
| WA-UW-071966      | OP169344.1 | SRR20913433                 |                              |
| WA-UW-091072      | OP715788.1 | SRR22033832                 |                              |
| WA-UW-095695      | OP715789.1 | SRR22033831                 |                              |
| WA-UW-087572      | OP628476.1 | SRR21887146                 |                              |
| WA-UW-081603      | OP628444.1 | SRR21887145                 |                              |
| WA-UW-073909      | OP055800.1 | SRR20653196                 |                              |
| WA-UW-078327      | OP055801.1 | SRR20653195                 |                              |
| Unknown-UW-077794 | OP055802.1 | SRR20653194                 |                              |
| Unknown-UW-073599 | OP055803.1 | SRR20653193                 |                              |
| WA-UW-076724      | OP055804.1 | SRR20653192                 |                              |
| Unknown-UW-076991 | OP055805.1 | SRR20653191                 |                              |
| WA-UW-079141      | OP055806.1 | SRR20653190                 |                              |
| WA-UW-074372      | OP055807.1 | SRR20653189                 |                              |
| WA-UW-075986      | OP055808.1 | SRR20653188                 |                              |
| WA-UW-076082      | OP055809.1 | SRR20653187                 |                              |
| WA-UW-073974      | OP123040.1 | SRR20731575                 |                              |
| WA-UW-070134      | OP123041.1 | SRR20731574                 |                              |
| WA-UW-077622      | OP123042.1 | SRR20731573                 |                              |
| WA-UW-077836      | OP123043.1 | SRR20731572                 |                              |
| WA-UW-071246      | OP123044.1 | SRR20736996                 |                              |
| WA-UW-076225      | OP123045.1 | SRR20736995                 |                              |
| WA-UW-078870      | OP123046.1 | SRR20736992                 |                              |
| WA-UW-071121      | OP123047.1 | SRR20736991                 |                              |
| WA-UW-076861      | OP123048.1 | SRR20736990                 |                              |
| WA-UW-073669      | OP123049.1 | SRR20736989                 |                              |
| WA-UW-076854      | OP123050.1 | SRR20736988                 |                              |
| OH-UW-070426      | OP123051.1 | SRR20736987                 |                              |
| OH-UW-078654      | OP123052.1 | SRR20736986                 |                              |
| OH-UW-071686      | OP123053.1 | SRR20736985                 |                              |

|              |            |             |  |
|--------------|------------|-------------|--|
| OH-UW-077163 | OP123054.1 | SRR20736994 |  |
| OH-UW-070822 | OP123055.1 | SRR20736993 |  |
| WA-UW-070499 | OP169336.1 | SRR20913445 |  |
| OH-UW-079847 | OP169337.1 | SRR20913444 |  |
| OH-UW-074058 | OP169338.1 | SRR20913440 |  |
| OH-UW-076485 | OP169339.1 | SRR20913439 |  |
| WA-UW-074224 | OP169340.1 | SRR20913438 |  |
| OH-UW-072752 | OP169342.1 | SRR20913435 |  |
| OH-UW-075598 | OP169343.1 | SRR20913434 |  |
| WA-UW-075687 | OP169345.1 | SRR20913443 |  |
| WA-UW-072839 | OP169346.1 | SRR20913442 |  |
| WA-UW-079401 | OP184760.1 | SRR20973040 |  |
| WA-UW-078603 | OP184761.1 | SRR20973039 |  |
| WA-UW-074949 | OP184762.1 | SRR20973038 |  |
| WA-UW-076773 | OP184763.1 | SRR20973037 |  |
| WA-UW-074932 | OP184764.1 | SRR20973036 |  |
| WA-UW-074988 | OP184765.1 | SRR20973035 |  |
| WA-UW-089015 | OP257243.1 | SRR21236108 |  |
| WA-UW-080268 | OP257244.1 | SRR21236106 |  |
| WA-UW-088225 | OP310068.1 | SRR21236105 |  |
| WA-UW-084909 | OP257245.1 | SRR21236104 |  |
| WA-UW-083578 | OP257246.1 | SRR21236103 |  |
| WA-UW-088432 | OP257247.1 | SRR21236102 |  |
| WA-UW-087424 | OP257248.1 | SRR21236101 |  |
| WA-UW-081786 | OP257249.1 | SRR21236100 |  |
| WA-UW-087527 | OP257250.1 | SRR21236099 |  |
| WA-UW-081272 | OP257251.1 | SRR21236096 |  |
| WA-UW-085937 | OP257252.1 | SRR21236095 |  |
| WA-UW-088081 | OP257253.1 | SRR21236094 |  |
| OH-UW-073812 | OP257254.1 | SRR21236092 |  |
| OH-UW-073319 | OP257255.1 | SRR21236091 |  |
| OH-UW-082260 | OP257256.1 | SRR21236089 |  |
| WA-UW-080706 | OP257257.1 | SRR21236088 |  |
| WA-UW-086040 | OP257258.1 | SRR21236086 |  |
| WA-UW-085684 | OP257259.1 | SRR21236085 |  |
| WA-UW-087006 | OP257260.1 | SRR21236084 |  |
| WA-UW-084325 | OP257261.1 | SRR21236083 |  |
| WA-UW-087619 | OP257262.1 | SRR21236082 |  |
| WA-UW-089987 | OP257263.1 | SRR21236081 |  |

|              |            |             |  |
|--------------|------------|-------------|--|
| WA-UW-080976 | OP257264.1 | SRR21236080 |  |
| WA-UW-088152 | OP310069.1 | SRR21236079 |  |
| WA-UW-089183 | OP257265.1 | SRR21236078 |  |
| WA-UW-083179 | OP257266.1 | SRR21236077 |  |
| WA-UW-084449 | OP257267.1 | SRR21236142 |  |
| OH-UW-086011 | OP310038.1 | SRR21236120 |  |
| WA-UW-080617 | OP310039.1 | SRR21236109 |  |
| WA-UW-088656 | OP310040.1 | SRR21236098 |  |
| WA-UW-080185 | OP310041.1 | SRR21236087 |  |
| WA-UW-089266 | OP310042.1 | SRR21236076 |  |
| WA-UW-086841 | OP310043.1 | SRR21236075 |  |
| WA-UW-083888 | OP310044.1 | SRR21236074 |  |
| WA-UW-080043 | OP310045.1 | SRR21236141 |  |
| WA-UW-083914 | OP310046.1 | SRR21236140 |  |
| WA-UW-087301 | OP310047.1 | SRR21236139 |  |
| WA-UW-088871 | OP310048.1 | SRR21236138 |  |
| OH-UW-085556 | OP310049.1 | SRR21236137 |  |
| OH-UW-085701 | OP310050.1 | SRR21236136 |  |
| WA-UW-082029 | OP310051.1 | SRR21236135 |  |
| WA-UW-081935 | OP310052.1 | SRR21236134 |  |
| WA-UW-082670 | OP310053.1 | SRR21236133 |  |
| WA-UW-088213 | OP310054.1 | SRR21236132 |  |
| WA-UW-086360 | OP310055.1 | SRR21236130 |  |
| WA-UW-089437 | OP310056.1 | SRR21236129 |  |
| WA-UW-089714 | OP310057.1 | SRR21236128 |  |
| WA-UW-087349 | OP310058.1 | SRR21236127 |  |
| OH-UW-089521 | OP310059.1 | SRR21236126 |  |
| OH-UW-082225 | OP310060.1 | SRR21236125 |  |
| WA-UW-088764 | OP310061.1 | SRR21236124 |  |
| WA-UW-089836 | OP310062.1 | SRR21236123 |  |
| WA-UW-082810 | OP310063.1 | SRR21236122 |  |
| WA-UW-082497 | OP310064.1 | SRR21236121 |  |
| WA-UW-088973 | OP310065.1 | SRR21236119 |  |
| WA-UW-089152 | OP310066.1 | SRR21236118 |  |
| WA-UW-082625 | OP310067.1 | SRR21236116 |  |
| WA-UW-083953 | OP328307.1 | SRR21236131 |  |
| WA-UW-083083 | OP328308.1 | SRR21236115 |  |
| WA-UW-089142 | OP328309.1 | SRR21236114 |  |
| WA-UW-088725 | OP328310.1 | SRR21236112 |  |

|              |            |             |  |
|--------------|------------|-------------|--|
| WA-UW-088258 | OP328311.1 | SRR21236111 |  |
| WA-UW-087564 | OP328312.1 | SRR21236110 |  |
| WA-UW-080292 | OP392536.1 | SRR21524966 |  |
| WA-UW-080834 | OP392537.1 | SRR21524964 |  |
| WA-UW-083584 | OP392543.1 | SRR21524963 |  |
| OH-UW-089384 | OP392534.1 | SRR21524962 |  |
| WA-UW-085171 | OP392546.1 | SRR21524961 |  |
| WA-UW-087094 | OP392548.1 | SRR21524960 |  |
| WA-UW-080100 | OP392535.1 | SRR21524985 |  |
| OH-UW-085672 | OP392533.1 | SRR21524984 |  |
| OH-UW-080114 | OP392532.1 | SRR21524983 |  |
| WA-UW-088960 | OP392553.1 | SRR21524982 |  |
| WA-UW-083506 | OP392542.1 | SRR21524981 |  |
| WA-UW-081714 | OP392538.1 | SRR21524978 |  |
| WA-UW-082880 | OP392541.1 | SRR21524977 |  |
| WA-UW-087104 | OP392549.1 | SRR21524976 |  |
| WA-UW-083781 | OP392544.1 | SRR21524974 |  |
| WA-UW-085462 | OP392547.1 | SRR21524972 |  |
| WA-UW-088325 | OP392552.1 | SRR21524971 |  |
| OH-UW-071356 | OP392531.1 | SRR21524970 |  |
| WA-UW-088092 | OP392551.1 | SRR21524968 |  |
| WA-UW-082770 | OP392540.1 | SRR21524969 |  |
| WA-UW-087336 | OP392550.1 | SRR21524987 |  |
| WA-UW-082215 | OP392539.1 | SRR21524967 |  |
| WA-UW-084148 | OP392545.1 | SRR21524986 |  |
