# Supplementary material for: ORF-Interrupting Mutations in Monkeypox Virus Genomes from Washington and Ohio, 2022
Source: MDPI journal article supplement (doi:10.3390/v14112393), 2022-10-29
Supplement: s1 [file s1]

## Supplementary Materials

### Supplementary Table S2. Monkeypox virus variants mutation allele frequencies calculated using pysamstats v1.1.2

(<https://github.com/alimanfoo/pysamstats/releases/tag/v1.1.2>) with a minimum base quality phred score of 20. ON563414.3 was used as reference. Resequenced samples are indicated by asterisks.

| sample        | pos    | ref | base counts | matches | mismatches | deletions | insertions | A    | C   | T    | G   | mismatch/<br>indel frequency |
|---------------|--------|-----|-------------|---------|------------|-----------|------------|------|-----|------|-----|------------------------------|
| OH-UW-070197  | 11764  | C   | 2734        | 162     | 5          | 2567      | 0          | 0    | 162 | 5    | 0   | 0.9389                       |
| OH-UW-070197* | 11764  | C   | 3126        | 195     | 7          | 2924      | 0          | 0    | 195 | 7    | 0   | 0.9354                       |
| OH-UW-070832  | 5612   | G   | 3475        | 0       | 3475       | 0         | 0          | 3475 | 0   | 0    | 0   | 1.0000                       |
| OH-UW-070832* | 5612   | G   | 540         | 1       | 539        | 0         | 0          | 539  | 0   | 0    | 1   | 0.9981                       |
| OH-UW-070832  | 191594 | C   | 3471        | 2       | 3469       | 0         | 0          | 0    | 2   | 3469 | 0   | 0.9994                       |
| OH-UW-070832* | 191594 | C   | 515         | 0       | 515        | 0         | 0          | 0    | 0   | 515  | 0   | 1.0000                       |
| OH-UW-071048  | 128943 | G   | 121         | 117     | 4          | 0         | 114        | 4    | 0   | 0    | 117 | 0.9421                       |
| OH-UW-071048* | 128943 | G   | 299         | 296     | 3          | 0         | 258        | 3    | 0   | 0    | 296 | 0.8629                       |
| OH-UW-078962  | 5612   | G   | 441         | 0       | 441        | 0         | 0          | 441  | 0   | 0    | 0   | 1.0000                       |
| OH-UW-078962* | 5612   | G   | 586         | 0       | 586        | 0         | 0          | 586  | 0   | 0    | 0   | 1.0000                       |
| OH-UW-078962  | 191594 | C   | 452         | 0       | 452        | 0         | 0          | 0    | 0   | 452  | 0   | 1.0000                       |
| OH-UW-078962* | 191594 | C   | 605         | 1       | 604        | 0         | 0          | 0    | 1   | 604  | 0   | 0.9983                       |
| OH-UW-086376  | 5612   | G   | 1874        | 0       | 1874       | 0         | 0          | 1874 | 0   | 0    | 0   | 1.0000                       |
| OH-UW-086376* | 5612   | G   | 1856        | 0       | 1856       | 0         | 0          | 1856 | 0   | 0    | 0   | 1.0000                       |
| OH-UW-086376  | 191594 | C   | 1867        | 0       | 1867       | 0         | 0          | 0    | 0   | 1866 | 1   | 1.0000                       |
| OH-UW-086376* | 191594 | C   | 1954        | 0       | 1954       | 0         | 0          | 0    | 0   | 1954 | 0   | 1.0000                       |
| WA-UW-081469  | 155347 | C   | 18          | 2       | 16         | 0         | 0          | 0    | 2   | 16   | 0   | 0.8889                       |
| WA-UW-081469* | 155347 | C   | 14          | 5       | 9          | 0         | 0          | 0    | 5   | 9    | 0   | 0.6429                       |

**Supplementary Table S2 Cont.**

| sample        | position | ref | base counts | matches | mismatches | deletions | insertions | A   | C   | T   | G   | mismatch/<br>indel frequency |
|---------------|----------|-----|-------------|---------|------------|-----------|------------|-----|-----|-----|-----|------------------------------|
| WA-UW-082488  | 5612     | G   | 880         | 1       | 879        | 0         | 0          | 879 | 0   | 0   | 1   | 0.9989                       |
| WA-UW-082488* | 5612     | G   | 864         | 0       | 864        | 0         | 0          | 864 | 0   | 0   | 0   | 1.0000                       |
| WA-UW-082488  | 191594   | C   | 868         | 0       | 868        | 0         | 0          | 0   | 0   | 868 | 0   | 1.0000                       |
| WA-UW-082488* | 191594   | C   | 838         | 0       | 838        | 0         | 0          | 0   | 0   | 838 | 0   | 1.0000                       |
| WA-UW-083698  | 151619   | C   | 137         | 0       | 137        | 0         | 0          | 0   | 0   | 137 | 0   | 1.0000                       |
| WA-UW-083698* | 151619   | C   | 117         | 0       | 117        | 0         | 0          | 0   | 0   | 117 | 0   | 1.0000                       |
| WA-UW-084331  | 25984    | C   | 101         | 0       | 101        | 0         | 0          | 0   | 0   | 101 | 0   | 1.0000                       |
| WA-UW-084331* | 25984    | C   | 213         | 2       | 211        | 0         | 0          | 0   | 2   | 211 | 0   | 0.9906                       |
| WA-UW-085393  | 1529     | G   | 496         | 1       | 495        | 0         | 0          | 495 | 0   | 0   | 1   | 0.9980                       |
| WA-UW-085393* | 1529     | G   | 228         | 0       | 228        | 0         | 0          | 228 | 0   | 0   | 0   | 1.0000                       |
| WA-UW-085393  | 195677   | C   | 484         | 1       | 483        | 0         | 0          | 0   | 1   | 483 | 0   | 0.9979                       |
| WA-UW-085393* | 195677   | C   | 232         | 1       | 231        | 0         | 0          | 0   | 1   | 231 | 0   | 0.9957                       |
| WA-UW-086026  | 5612     | G   | 636         | 257     | 379        | 0         | 0          | 379 | 0   | 0   | 257 | 0.5959                       |
| WA-UW-086026* | 5612     | G   | 993         | 371     | 622        | 0         | 0          | 622 | 0   | 0   | 371 | 0.6264                       |
| WA-UW-086026  | 191594   | C   | 620         | 242     | 378        | 0         | 0          | 0   | 242 | 378 | 0   | 0.6097                       |
| WA-UW-086026* | 191594   | C   | 1020        | 382     | 638        | 0         | 0          | 0   | 382 | 638 | 0   | 0.6255                       |
| WA-UW-088793  | 151619   | C   | 82          | 0       | 82         | 0         | 0          | 0   | 0   | 82  | 0   | 1.0000                       |
| WA-UW-088793* | 151619   | C   | 72          | 0       | 72         | 0         | 0          | 0   | 0   | 72  | 0   | 1.0000                       |

**Supplementary Table S2 Cont.**

| sample        | position | ref | base counts | matches | mismatches | deletions | insertions | A    | C | T    | G | mismatch/<br>indel frequency |
|---------------|----------|-----|-------------|---------|------------|-----------|------------|------|---|------|---|------------------------------|
| WA-UW-080247  | 191594   | C   | 2071        | 0       | 2071       | 0         | 0          | 0    | 0 | 2070 | 1 | 1.0000                       |
| WA-UW-080247* | 191594   | C   | 475         | 0       | 475        | 0         | 0          | 0    | 0 | 475  | 0 | 1.0000                       |
| WA-UW-080247  | 5612     | G   | 2097        | 0       | 2097       | 0         | 0          | 2097 | 0 | 0    | 0 | 1.0000                       |
| WA-UW-080247* | 5612     | G   | 465         | 2       | 463        | 0         | 0          | 463  | 0 | 0    | 2 | 0.9957                       |
| WA-UW-082002  | 12116    | G   | 1813        | 0       | 1813       | 0         | 0          | 1813 | 0 | 0    | 0 | 1.0000                       |
| WA-UW-082002* | 12116    | G   | 901         | 0       | 901        | 0         | 0          | 901  | 0 | 0    | 0 | 1.0000                       |
| WA-UW-082002  | 1529     | G   | 3954        | 2       | 3952       | 0         | 0          | 3952 | 0 | 0    | 2 | 0.9995                       |
| WA-UW-082002* | 1529     | G   | 2362        | 1       | 2361       | 0         | 0          | 2361 | 0 | 0    | 1 | 0.9996                       |
| WA-UW-082002  | 195677   | C   | 3970        | 0       | 3970       | 0         | 0          | 0    | 0 | 3970 | 0 | 1.0000                       |
| WA-UW-082002* | 195677   | C   | 2395        | 1       | 2394       | 0         | 0          | 0    | 1 | 2394 | 0 | 0.9996                       |
| WA-UW-082515  | 191594   | C   | 731         | 0       | 731        | 0         | 0          | 0    | 0 | 731  | 0 | 1.0000                       |
| WA-UW-082515* | 191594   | C   | 297         | 0       | 297        | 0         | 0          | 0    | 0 | 297  | 0 | 1.0000                       |
| WA-UW-082515  | 5612     | G   | 746         | 0       | 746        | 0         | 0          | 746  | 0 | 0    | 0 | 1.0000                       |
| WA-UW-082515* | 5612     | G   | 311         | 1       | 310        | 0         | 0          | 310  | 0 | 0    | 1 | 0.9968                       |
| WA-UW-085088  | 25984    | C   | 20          | 0       | 20         | 0         | 0          | 0    | 0 | 20   | 0 | 1.0000                       |
| WA-UW-085088* | 25984    | C   | 15          | 0       | 15         | 0         | 0          | 0    | 0 | 15   | 0 | 1.0000                       |
| WA-UW-085241  | 12116    | G   | 227         | 0       | 227        | 0         | 0          | 227  | 0 | 0    | 0 | 1.0000                       |
| WA-UW-085241* | 12116    | G   | 63          | 0       | 63         | 0         | 0          | 63   | 0 | 0    | 0 | 1.0000                       |

**Supplementary Table S2 Cont.**

| sample        | position | ref | base counts | matches | mismatches | deletions | insertions | A    | C | T    | G | mismatch/<br>indel frequency |
|---------------|----------|-----|-------------|---------|------------|-----------|------------|------|---|------|---|------------------------------|
| WA-UW-085241  | 1529     | G   | 856         | 0       | 856        | 0         | 0          | 856  | 0 | 0    | 0 | 1.0000                       |
| WA-UW-085241* | 1529     | G   | 318         | 1       | 317        | 0         | 0          | 317  | 0 | 0    | 1 | 0.9969                       |
| WA-UW-085241  | 195677   | C   | 825         | 0       | 825        | 0         | 0          | 0    | 0 | 825  | 0 | 1.0000                       |
| WA-UW-085241* | 195677   | C   | 346         | 0       | 346        | 0         | 0          | 0    | 0 | 346  | 0 | 1.0000                       |
| WA-UW-091243  | 191594   | C   | 1355        | 1       | 1354       | 0         | 0          | 0    | 1 | 1354 | 0 | 0.9993                       |
| WA-UW-091243* | 191594   | C   | 1115        | 0       | 1115       | 0         | 0          | 0    | 0 | 1115 | 0 | 1.0000                       |
| WA-UW-091243  | 5612     | G   | 1352        | 0       | 1351       | 1         | 0          | 1351 | 0 | 0    | 0 | 0.9993                       |
| WA-UW-091243* | 5612     | G   | 1092        | 0       | 1092       | 0         | 0          | 1092 | 0 | 0    | 0 | 1.0000                       |
| WA-UW-092113  | 25984    | C   | 250         | 0       | 250        | 0         | 0          | 0    | 0 | 250  | 0 | 1.0000                       |
| WA-UW-092113* | 25984    | C   | 27          | 0       | 27         | 0         | 0          | 0    | 0 | 27   | 0 | 1.0000                       |
| WA-UW-092889  | 191594   | C   | 760         | 0       | 760        | 0         | 0          | 0    | 0 | 760  | 0 | 1.0000                       |
| WA-UW-092889* | 191594   | C   | 779         | 0       | 779        | 0         | 0          | 0    | 0 | 779  | 0 | 1.0000                       |
| WA-UW-092889  | 5612     | G   | 751         | 0       | 751        | 0         | 0          | 751  | 0 | 0    | 0 | 1.0000                       |
| WA-UW-092889* | 5612     | G   | 783         | 0       | 783        | 0         | 0          | 783  | 0 | 0    | 0 | 1.0000                       |
| WA-UW-093570  | 25984    | C   | 23          | 0       | 23         | 0         | 0          | 0    | 0 | 23   | 0 | 1.0000                       |
| WA-UW-093570* | 25984    | C   | 23          | 0       | 23         | 0         | 0          | 0    | 0 | 23   | 0 | 1.0000                       |
| WA-UW-098497  | 191594   | C   | 98          | 0       | 98         | 0         | 0          | 0    | 0 | 98   | 0 | 1.0000                       |
| WA-UW-098497* | 191594   | C   | 99          | 0       | 99         | 0         | 0          | 0    | 0 | 99   | 0 | 1.0000                       |
| WA-UW-098497  | 5612     | G   | 94          | 0       | 94         | 0         | 0          | 94   | 0 | 0    | 0 | 1.0000                       |
| WA-UW-098497* | 5612     | G   | 106         | 0       | 106        | 0         | 0          | 106  | 0 | 0    | 0 | 1.0000                       |
